1 **TITLE**

2 Fungal Bioaerosols at Five Dairy Farms: A Novel Approach to Describe Workers' Exposure

3

4 **RUNNING TITLE**

5 Fungal Bioaerosols at Five Dairy Farms

6 **AUTHORS**

7 Hamza Mbareche<sup>1,2</sup>, Marc Veillette<sup>1</sup>, Guillaume J Bilodeau<sup>3</sup> and Caroline Duchaine<sup>1,2</sup>

8

9 **AUTHORS' AFFILIATION**

10 1. Centre de recherche de l'institut universitaire de cardiologie et de pneumologie de Québec,

11 Québec City (Qc), Canada

12 2. Département de biochimie, de microbiologie et de bio-informatique, Faculté des sciences et de  
13 génie, Université Laval, Québec City (Qc), Canada

14 3.Pathogen Identification Research Lab, Canadian Food Inspection Agency (CFIA). Ottawa,  
15 Canada

16

17 **KEYWORDS**

18 Bioaerosols, fungi, dairy farms, next-generation sequencing, culture dependent, worker exposure

19

20 **CORRESPONDING AUTHOR**

21 Mailing address: Caroline Duchaine, Ph.D., Centre de Recherche de l'Institut Universitaire de

22 Cardiologie et de Pneumologie de Québec, 2725 Chemin Ste-Foy, Québec, Canada, G1V 4G5.

23 Phone: (418) 656-8711 ext. 5837. Fax: 418 656-4509. E-mail:  
24 Caroline.Duchaine@bcm.ulaval.ca

## 25 Abstract

26 Occupational exposure to harmful bioaerosols in industrial environments is a real treat to the  
27 workers. In particular, dairy-farm workers are exposed to high levels of fungal bioaerosols on a  
28 daily basis. Associating bioaerosol exposure and health problems is challenging and adequate  
29 exposure monitoring is a top priority for aerosol scientists. Using only culture-based tools do not  
30 express the overall microbial diversity and underestimate the large spectrum of microbes in  
31 bioaerosols and therefore the identification of new airborne etiological agents. The aim of this  
32 study was to provide an in-depth characterization of fungal exposure at Eastern Canadian dairy  
33 farms using qPCR and next-generation sequencing methods. Concentrations of  
34 *Penicillium/Aspergillus* ranged from  $4.6 \times 10^6$  to  $9.4 \times 10^6$  gene copies/m<sup>3</sup> and from  $1 \times 10^4$  gene  
35 copies/m<sup>3</sup> to  $4.8 \times 10^5$  gene copies/m<sup>3</sup> for *Aspergillus fumigatus*. Differences in the diversity  
36 profiles of the five dairy farms support the idea that the novel approach identifies a large number  
37 of fungal taxa. These variations may be explained by the presence of different and multiple  
38 sources of fungal bioaerosols at dairy farms. The presence of a diverse portrait of fungi in air  
39 may represent a health risk for workers who are exposed on a daily basis. In some cases, the  
40 allergen/infective activity of the fungi may not be known and can increase the risks to workers.  
41 The broad spectrum of fungi detected in this study includes many known pathogens and proves  
42 that adequate monitoring of bioaerosol exposure is necessary to evaluate and minimize risks.

## 43 Importance

44 While bioaerosols are a major concern for public health, accurately assessing human exposure is

45 challenging. Highly contaminated environments, such as agricultural facilities, contain a broad  
46 diversity of aerosolized fungi that may impact human health. Effective bioaerosol monitoring is  
47 increasingly recognized as a strategic approach for achieving occupational exposure description.  
48 Workers exposure to diverse fungal communities is certain, as fungi are ubiquitous in the  
49 environments and the presence of potential sources increase their presence in the air. Applying  
50 new molecular approaches to describe occupational exposure is a necessary work around the  
51 traditional culture approaches and the biases they introduce to such studies. The importance of  
52 the newly developed approach can help to prevent worker's health problems.

53

## 54 Introduction

55 Exposure to airborne microbial flora or bioaerosols in the environment, whether from indoor or  
56 outdoor sources, is an everyday phenomenon that may lead to a wide range of human diseases.  
57 Compared to other well-described microbial habitats, such as water and soil, little is known  
58 about the diversity of airborne microbes (1, 2, 3). Whether aerosolized from natural sources (e.g.,  
59 wind) or human activities (e.g., industrial processes), the dispersal of bioaerosols can impact  
60 public health due to the presence of highly diverse and dynamic microbial communities in urban  
61 and rural environments. These impacts range from allergies to asthma and can lead to exposure  
62 to pathogens (4, 5, 6, 7). Occupational exposure to harmful bioaerosols in industrial  
63 environments can be worrisome depending on the types of raw materials present, and the  
64 disturbance and the intensity of air movement and ventilation. For example, animal feeding  
65 operations involve various sources of biological material potentially associated with respiratory  
66 problems (8, 9, 10, 11, 12, 13).

67 Fungal bioaerosols consist of spores, mycelium fragments and debris which are easily inhaled by  
68 workers and cause myriad symptoms including allergies, irritation and opportunistic infections.  
69 Long-term lung exposure to fungal bioaerosols can be associated with chronic diseases while the  
70 effects of short-term exposure range from irritation of the eyes and nose to coughing and a sore  
71 throat (14, 15). Dairy-farm workers are exposed to high levels of fungal bioaerosols on a daily  
72 basis. In fact, fungal concentrations in the air at dairy farms were reported to be higher than  
73 bacterial concentrations and may reach up to  $10^{11}$  colony-forming units/m<sup>3</sup> (16). At dairy farms,  
74 hay and straw are important sources of fungal bioaerosols, as fungi naturally colonize those  
75 substrates, especially if there are high moisture levels (17, 18, 19). Building type and  
76 management practices (e.g. free stall, use of various bedding materials, ventilation type) also  
77 influence the fungal load in bioaerosols.

78 The inhalation of large concentrations of fungal bioaerosols can lead to a variety of respiratory  
79 problems. The major allergy-related diseases caused by fungi are allergic asthma (20, 21, 22),  
80 allergic rhinitis (23, 24), allergic sinusitis (25), bronchopulmonary mycoses (26, 27), and  
81 hypersensitivity pneumonitis (28, 29, 30). The latter includes farmer's lung disease (allergic  
82 alveolitis), a disease specific to dairy farm workers (31, 32). Furthermore, a component of the  
83 fungal cell wall ((1-3)- $\beta$ -D glucan), is believed to play a role in pulmonary inflammation,  
84 increased sensitivity to endotoxins and pulmonary embolisms (33, 34, 35). Some respiratory  
85 symptoms are also associated with fungal exposure including mucous membrane irritation  
86 syndrome, nasal congestion, sore throat, and irritation of the nose and eyes (36, 37, 38, 39).

87 The link between exposure to fungi and occupational diseases is often difficult to prove due to  
88 undocumented fungi in bioaerosols. This lack of information is primarily due to the methods  
89 used to describe fungi present in the workplace. In diversity studies, culture methods are

90 associated with well-known biases as only the viable/culturable portion of the samples is  
91 represented. Using culture-independent molecular methods is a good solution for getting around  
92 the non-viable/non-culturable limits of the commonly used culture-based methods. Molecular  
93 methods are based on the detection of the genetic material of organisms present in a given  
94 sample. Applying these methods to samples from composting and biomethanization  
95 environments allowed the identification and quantification of fungal bioaerosols present and a  
96 better understanding of human exposure (40, 41). In dairy farms, only culture-dependent  
97 methods have been used to assess occupational exposure or ambient fungal aerosols (42, 43, 44,  
98 45). All of the previous studies identified the same frequently encountered genera including  
99 *Aspergillus*, *Penicillium*, *Cladosporium* and *Alternaria*. In Canada, the most recent study that  
100 described the airborne fungal microflora in dairy farms is from 1999 (16).  
101 Because of the dearth of information about fungal diversity and concentrations in bioaerosols at  
102 dairy farms, the aim of this study was to provide an in-depth characterization of fungal exposure  
103 at Eastern Canadian dairy farms using qPCR and next-generation sequencing methods.

## 104 Results

105 Concentrations of fungal bioaerosols using culture methods to capture the viable spores and  
106 qPCR for DNA quantification of *Penicillium/Aspergillus* genera and *Aspergillus fumigatus*  
107 species are shown in Fig.1. Using culture methods, the results ranged from  $3.2 \times 10^6$  to  $8.2 \times 10^6$   
108 CFU/m<sup>3</sup> in samples from the five dairy farms (DF1 to DF5). A strong correlation was observed  
109 between concentrations obtained by culture methods and those obtained by qPCR targeting  
110 *Penicillium* and *Aspergillus* (*PenAsp*). Concentrations of *PenAsp* ranged from  $4.6 \times 10^6$  to  $9.4 \times$   
111  $10^6$  gene copies/m<sup>3</sup> at the five dairy farms. Greater variance was observed in concentrations of  
112 *Aspergillus fumigatus* which, ranged from  $1 \times 10^4$  gene copies/m<sup>3</sup> at DF3 to  $4.8 \times 10^5$  gene

113 copies/m<sup>3</sup> at DF2. Concentrations of *Aspergillus fumigatus* at DF1, DF4 and DF5 were 3 x 10<sup>4</sup>,  
114 2.9 x 10<sup>4</sup> and 3.9 x 10<sup>5</sup> gene copies/m<sup>3</sup>, respectively. The highest concentrations of *PenAsp*  
115 coincided with the highest concentrations of *Aspergillus fumigatus* as observed at DF2 and DF5  
116 (Fig.1). The gap between the two concentrations was more notable in results from DF1, DF3 and  
117 DF4 where concentrations of *Aspergillus fumigatus* were lower.

118 Samples were separate by four categorical variables: *Type of milking, animal space, cattle feed,*  
119 *and type of ventilation.* Concentrations of *PenAsp* between groups of samples within each of  
120 those categories were compared. The same comparison was made for *Aspergillus fumigatus*  
121 concentrations. No significant differences ( $p \leq 0.05$ ) in concentrations were found between the  
122 groups of samples for any of the four variables for either *PenAsp* or *Aspergillus fumigatus* (Table  
123 5).

124 Fungal communities were described by Illumina Miseq sequencing of the ITS1 region of the  
125 fungal ribosomal RNA encoding gene. After quality filtering, dereplication and chimera  
126 checking, 307 304 sequences were clustered into 188 OTUs. In order to confirm that the  
127 sequencing depth was adequate to describe the fungal diversity at each of the sampling sites,  
128 rarefaction analyses were performed using the observed OTUs alpha diversity metric. The  
129 lowest-depth sample parameter was used to determine the sequencing depth of the rarefaction  
130 analyses which was approximately 40 000 sequences per sample. Samples with a sequencing  
131 depth lower than 40 000 were excluded from analyses. The higher the sequencing depth, the  
132 more likely it is that the true diversity of the fungi in aerosols is captured. All of the samples  
133 from the five dairy farms met this criterion and were included in the analyses. The values shown  
134 in Fig.2 were calculated following these steps: ten values from 10 to 40 000 sequences per  
135 sample were randomly selected. For each of these values the corresponding number of OTUs

136 observed was noted for all of the samples. The plateaus observed in the five curves shown in  
137 Fig.2 indicate an efficient coverage of the fungal diversity, as no more OTUs were observed  
138 even with much greater numbers of sequences per sample.

139 Many next-generation sequencing surveys of microbial communities aim to compare the  
140 composition of different groups of samples (beta diversity). This multivariate approach can be  
141 used to assess the effects of several environmental factors on the microbial content of the  
142 samples. The environmental factors, or “variables”, are used to separate the samples into  
143 different groups. In this case, the same four variables used to categorize qPCR concentrations  
144 were also used for the next generation sequencing multivariate analysis and included: *Animal*  
145 *space*, *Cattle feed*, *Type of milking* and *Type of ventilation*. One of the techniques commonly  
146 used by microbial ecologists relies on the creation of a dissimilarity matrix like the Bray-Curtis  
147 index. This index was used to evaluate the distance, taken pairwise between samples  
148 (representing how closely related samples are). The index uses numbers between 0 and 1, where  
149 0 means the two samples have the same composition and 1 means that they do not share any  
150 species. Because the Bray-Curtis dissimilarity matrix uses the absolute abundance of OTUs, it is  
151 necessary to use a rarefied OTU table as the input for the dissimilarity calculation. One function  
152 of multivariate analyses is to represent inter-sample distances in a 2-dimensional space using  
153 ordination (55). To evaluate ordination patterns, one of the most common methods used is the  
154 Principal coordinate analyses (PCoA). In this case, the input used for ordination calculation and  
155 clustering was the dissimilarity matrix calculated above. The matrix was transformed to  
156 coordinates and then plotted using the principal coordinates script in QIIME. Table 6 shows a  
157 summary of the results from the PCoA analyses (the PCoA figure is presented as a  
158 supplementary file 1). The three principal coordinate axes captured more than 90% of the

159 variation in the DF samples. Samples were coloured according to the four variables to visualize  
160 and identify sample clustering. Samples closer to one another are more similar than those that are  
161 further away from each other. No obvious sample clustering was observed for any of the four  
162 variables. Though they were not clearly clustered, calculations based on *Animal space* and *Cattle*  
163 *feed* were close together than the others. The samples from confined spaces were grouped far  
164 from those from the semi-confined space. The forage samples were more closely grouped  
165 compared to the samples with concentrates and forage & concentrates combinations. No patterns  
166 were observed when samples were coloured according to the *Type of milking* or *Type of*  
167 *ventilation*.

168 To determine the statistical significance of the variance observed in the PCoA analyses, a  
169 PERMANOVA test was performed on the Bray-Curtis dissimilarity matrix. This non-parametric  
170 test allows for the analysis of the strength that each variable have in explaining the variations  
171 observed between samples (sample clustering). It is based on the ANOVA experimental design  
172 but analyzes the variance and determines the significance using permutations, as it is a non-  
173 parametric test (56). Whereas ANOVA/MANOVA assumes normal distributions and a  
174 Euclidean distance, PERMANOVA can be used with any distance measure as long as it is  
175 appropriate to the dataset. The same variables used for color clustering in the PCoA analyses  
176 were used with the PERMANOVA test for statistical significance of sample clustering. The  
177 QIIME compare categories script was used to generate the statistical results. Results from the  
178 PERMANOVA are consistent with the color clustering observations made based on the PCoA  
179 analyses. Using a significance of 0.05, the only variables that exhibited significant differences  
180 among sample groupings were *Animal space* (p-value = 0.04) and *Cattle feed* (p-value = 0.05).



181 The two other variables tested did not exhibit significant differences (*Type of milking* p-value =  
182 0.61 and *Ventilation* p-value = 0.90).

183 The taxonomy of the microbes in the air samples collected from the dairy farms was determined  
184 by comparing Illumina sequences to the UNITE database. Of the 12 fungal classes detected in  
185 samples from the dairy farms (Fig.4) six classes seem to be dominant: *Eurotiomycetes*,  
186 *Dothideomycetes*, *Wallemiomycetes*, *Agaricomycetes*, *Sordariomycetes* and *Tremellomycetes*.  
187 However, there is variability in this dominance between the diversity profiles from the five dairy  
188 farms. At DF3 and DF5 the class *Eurotiomycetes* have much greater relative abundance than the  
189 other classes. In DF2 samples, *Dothideomycetes* and *Wallemiomycetes* are more abundant than  
190 the other classes. The *Sordariomycetes* class is particularly more abundant at DF1 compared to  
191 the other farms. Fungi from the class *Tremellomycetes* have greater relative abundance at DF4  
192 than any of the other farms. In fact, DF4 has the most diverse profile, in contrast to samples from  
193 DF3 where the class *Eurotiomycetes* represents 70% of the relative abundance.  
194 *Ustilaginomycotina* were detected only in samples from DF4.

195 Relative abundance of taxa was analyzed more thoroughly by examining the 20 most abundant  
196 genera at each dairy farm (Fig.4). From this list, only six fungi were present at all five of the  
197 dairy farms: *Aspergillus*, *Penicillium*, *Wallemia*, *Aureobasidium*, *Pleosporales* and  
198 *Tremellomycetes*. OTUs that were not identifiable to the genus level were identified to the  
199 highest taxonomic level (e.g class *Tremellomycetes* and order *Pleosporales*). Similar to  
200 observations made based on fungal class, diversity profiles of the genera present were quite  
201 variable between the five farms. The least diverse profile was observed in samples from DF3  
202 where *Penicillium* occupied 67% of the abundance. The most diverse profiles were from DF1,  
203 DF4 and DF5 as they exhibited the greatest variety of fungal genera. In DF2 samples, 52% of the

204 abundance was made up of *Wallemia* (31 %) and *Bipolaris* (21 %). The diversity profiles from  
205 the five dairy farms are larger than what is shown in Fig.4. Due to graphical limitations, only the  
206 most abundant fungi are represented. *Piptoporus* and *Microascus* were identified only at DF1.  
207 *Exobasidiomycetes*, *Microdochium*, *Dissoconium* and *Parastagonospora* were present at DF2  
208 exclusively. *Tubilicrinis* was detected only at DF3. *Mycoacia*, *Phlebia*, *Ustilago* and *Ganoderma*  
209 were identified solely at DF4. Finally, *Whickerhamomyces* was specific only to samples from  
210 DF5.

211 The diversity of fungi identified using the culture method was compared with the fungal  
212 diversity obtained using next generation sequencing (NGS). Using NGS, fungal genera  
213 representing greater than 1% of the total abundance of the five dairy farms combined are  
214 presented in Fig.5. For species identified using the culture approach, the fungi identified at more  
215 than one dairy farm were grouped together. The fungi that were detected only once by culture  
216 were *Trichoderma*, *Microdochium*, *Phoma*, *Apiospora*, *Botrytis*, *Conyothirium*, *Millerozyma*,  
217 *Neosetophoma*, *Irpex*, and *Debaryomyces*. Those species detected at more than one farm and  
218 their relative abundances are presented in Fig.6. The relative abundance of fungi identified by  
219 culture was calculated as follows: for each fungus, the number of times that it was isolated from  
220 the five dairy farms was calculated. Based on this sum, a percentage of relative abundance was  
221 calculated for each fungus and appears in the list in Fig.5. Only four fungi were detected by both  
222 approaches: *Penicillium*, *Aspergillus*, *Bipolaris* and *Sarocladium*. Of the 16 fungi isolated using  
223 culture techniques, three (*Hyphopichia*, *Gibellulopsis* et *Myceliophthora*) were not detected by  
224 NGS. The remaining 13, though they do not appear on the list, were detected with a total  
225 abundance of less than 1%. Many fungi genera were present but with a total relative abundance  
226 of less than 1% making the diversity profile more exhaustive than what is shown in the figures.

## 227 Discussion

228 Using molecular tools has enabled us to provide an in-depth description of the complex  
229 biodiversity of bioaerosols in various occupational environments (11, 57, 58, 40, 41). At dairy  
230 farms, molecular approaches targeting bacteria allow for a better understanding of the causes of  
231 occupational respiratory diseases (59, 60). Since hay and straw are important sources of fungal  
232 aerosols and are often ubiquitous at dairy farms, characterizing the fungal diversity of  
233 bioaerosols is essential to better understand their role in occupational exposure. As mentioned  
234 previously, most studies concerning dairy farm exposure use culture-based methods to study  
235 aerosolized fungi. To address the major bias associated with culture methodology, which  
236 represents only the viable portion of bioaerosols, this study also used a molecular approach  
237 combining qPCR and next generation sequencing to describe the bioaerosol fungal exposure at  
238 five dairy farms.

239 The *PenAsp* qPCR assay is a good indicator of the total quantities of *Aspergillus*, *Penicillium* and  
240 *Paecilomyces* conidia in air samples (61). Results of this study showed a strong correlation  
241 between concentrations of culturable fungi and *PenAsp*. This correlation supports the idea of  
242 using the qPCR *PenAsp* assay as an indicator of total fungal concentration in exposure studies.  
243 No significant differences were observed in fungal concentrations obtained from the five dairy  
244 farms using qPCR and culture. These concentrations are comparable to concentrations obtained  
245 using culture methods almost two decades ago from Eastern Canadian dairy farms (16, 59). This  
246 suggests that dairy-farm workers are still at risk for developing diseases linked to fungal  
247 exposure. Furthermore, *Aspergillus fumigatus* was specifically quantified in aerosols from areas  
248 at dairy farms where humans work because it is a known pathogen that causes aspergillosis,  
249 allergic bronchopulmonary aspergillosis and is involved in other pulmonary diseases (62, 63). In

250 some cases, the gap between the concentrations of *PenAsp* and *Aspergillus fumigatus* can be  
251 used as an indicator of the diversity of *Aspergillus* and *Penicillium* genera in air samples.  
252 The qPCR analysis allowed the quantification of potentially hazardous fungal spores in  
253 bioaerosols. No particular correlation was found between the types of ventilation, animal  
254 confinement, cattle feed and milking methods, and concentrations of *PenAsp* and *Aspergillus*  
255 *fumigatus* in aerosols from dairy farms. These results prove that no matter how different the  
256 building attributes, animal confinement and types of milking activities are, exposure to fungal  
257 bioaerosols should be considered regardless of the modernity of the method used.  
258 The MiSeq Illumina sequencing depth used in this study was adequate for covering the true  
259 diversity of fungi in the samples. Targeting the ITS1 genomic region provided an in-depth  
260 analysis of the fungal composition of bioaerosols at the five dairy farms. The methodology  
261 applied also revealed the variations in fungal communities present in the air (40, 41). Differences  
262 in the diversity profiles support the idea that this approach identifies a large number, if not all of  
263 the taxa that are responsible for the fungal community changes. These variations in diversity  
264 profiles may be explained by the presence of different and multiple sources of fungal bioaerosols  
265 at dairy farms. Four variables were chosen to examine these differences more closely. The use of  
266 multivariate analyses, PCoA, coupled with a PERMANOVA test, offers a robust statistical  
267 significance of sample clustering using distance matrices. Both analyses (PCoA and  
268 PERMANOVA) resulted in the same conclusions in regards of sample clustering confirming  
269 their usefulness as tools to visualize and measure sample clustering. The main source of the  
270 variation in diversity is associated with cattle feed type. Dairy cattle are fed a wide range of  
271 feedstuffs, from forage (grasses, legumes, hay, straw, grass silage and corn silage) to  
272 concentrates (barley and maize). The presence of *Ustilaginomycotina* and *Exobasidiomycetes*

273 could be explained by the presence of wheat and other grasses. These classes of fungi include the  
274 plant pathogen *Tilletia* known to affect various grasses. Biochemical changes in these products,  
275 like pH and water content, can affect their fungal composition (64, 65). Animal confinement also  
276 affected the fungal composition of bioaerosols. The semi-confined environment consists of an  
277 enclosure where dairy cattle have freedom to move around inside the enclosed space. The  
278 confined spaces allow no freedom of movement and each cow has its own space. These  
279 differences in the density of cows seem to have an impact on the fungal bioaerosols. The type of  
280 milking whether automated or manual, and the type of ventilation, either automatic or manual  
281 does not seem to have an effect on the fungal content of the bioaerosols collected. However, a  
282 limited number of dairy farms were visited during this study and multivariate analyses and  
283 sample clustering methods are known to perform better with a large number of samples. A larger  
284 number of air samples collected from different dairy farms would be useful to support the  
285 findings that milking method and or types of ventilation influences fungal bioaerosol variability.  
286 Other factors like building attributes, handling of feed, seed and silage, and method of spreading  
287 the bedding can affect the fungal content of the bioaerosols at dairy farms (66, 67, 68, 69). While  
288 PCoA gives a cursory assessment of the variables that affect sample clustering, these variables  
289 can often be harder to define. A set of chosen explanatory environmental factors does not  
290 guarantee that they have true explanatory power. There is always the possibility that an  
291 unexplored covariate is the real causal influence on the microbial ecology of the samples (70).  
292 Further research including larger sample sizes and additional variables should be conducted.  
293 *Agaricomycetes* are a group of fungi known for their role in wood-decaying activities and in  
294 ectomycorrhizal symbiosis (71, 72). The presence of agricultural planting material/products may  
295 explain the larger proportions of *Agaricomycetes* identified at DF1 and DF2 compared to the

296 three other farms. Conversely, *Eurotiomycetes* are a class of fungi linked to processes like  
297 fermentation used in food processing. Many genera of this class are natural decomposers and are  
298 involved in food spoilage (73,74). The presence of natural or processed foods at DF3, DF4 and  
299 DF5 might explain the greater abundance of *Eurotiomycetes* detected in the air at those farms.  
300 Additionally, the prevalence of *Eurotiomycetes* might also be explained by the presence of silage  
301 which is a fermented, high-moisture stored fodder used to feed cattle (75). Members of  
302 *Dothideomycetes* and *Tremellomycetes* include several important plant pathogens that grow on  
303 wood debris or decaying leaves (76, 77). *Wallemiomycetes* were detected at all five dairy farms.  
304 They were most prevalent at DF1 and DF2, representing 20% and 32% of genera detected,  
305 respectively. This class includes one order (*Wallemiales*), containing one family (*Wallemiaceae*),  
306 which in turn contains one genus (*Wallemia*) (78). These fungi can grow over a wide range of  
307 water activity from 0.69  $a_w$  to 0.997  $a_w$  (79). Water activity is the vapour pressure of water in the  
308 product divided by vapour pressure of pure water at the same temperature. High  $a_w$  support more  
309 microbial growth. *Wallemia* have been isolated in air samples from dairy farms in previous  
310 studies (80). Airborne *Wallemia* are suspected of playing a role in human allergies like bronchial  
311 asthma (81). A study conducted in France identified *Wallemia* as a causative agent of farmer's  
312 lung disease (82). Other prevalent fungal genera commonly found at dairy farms were identified  
313 in this study: *Aspergillus*, *Penicillium*, *Cladosporium*, *Alternaria*, *Nigrospora* and *Periconia*.  
314 For relative abundance, differences observed in the diversity profiles obtained by next generation  
315 sequencing (NGS) and culture methods may be explained by the hypothesis that the culture  
316 approach may be biased toward fungi from the rare biosphere. These results are consistent with  
317 the conclusions made by Shade and his collaborators (83) regarding the complementarity of  
318 culture-dependent and culture-independent approaches to studying bacterial diversity. The

319 premise of their study is that culture-dependent methods reveal bacteria from the rare biosphere  
320 and provide supplemental information to that obtained using a NGS approach. In the current  
321 case, this complementarity is true only for abundance. As mentioned previously, only three fungi  
322 were detected exclusively by culture, while more than a hundred fungi were identified by NGS  
323 and not by culture. This is consistent with the concept that culture methods may reveal less  
324 abundant taxa in an environment while NGS provides a more exhaustive diversity profile. To the  
325 best of our knowledge this is the first research to compare both approaches for examining  
326 aerosols at dairy farms.

327 The application of the NGS approach revealed a large fungal diversity profile in bioaerosols  
328 released from five dairy farms. The presence of a diverse portrait of fungi in air may represent a  
329 health risk for workers who are exposed on a daily basis. In some cases, the allergen/infective  
330 activity of the fungi may not be known and can increase the risks to workers. More specifically,  
331 the following fungi detected are known allergens and/or are opportunistic pathogens:  
332 *Aspergillus*, *Malassezia*, *Wallemia*, *Emericella*, *Fusarium*, *Alternaria* and *Candida*. *Malassezia*  
333 causes skin disorders and can lead to invasive infections in immunocompetent individuals (84).  
334 *Emericella* is a taxon of teleomorphs related to *Aspergillus*. Species of this group are known  
335 agents of chronic granulomatous disease (CGD; 85). *Acremonium* causes fungemia in  
336 immunosuppressed patients (86). *Fusarium* species are responsible for a broad range of health  
337 problems, from local and systemic infections to allergy-related diseases such as sinusitis, in  
338 immunodepressed individuals (87). *Alternaria* is an important allergen related to asthma (88).

## 339 Methodology

### 340 Environmental Field Samples

341 Air samples were collected from five dairy farms in Eastern Canada during summer 2016. At  
342 each farm, a sampling site was designated based on where activities that generate the most  
343 bioaerosols took place. The buildings at each farm exhibited differences in building type and  
344 characteristics (age, volume, ventilation), number of animals present (cows), methods of milking  
345 (automatic or manual) and types of animal feed animal were given. Table 1 presents a  
346 description of the sampling sites at each dairy farm. At each sampling site, three air samples  
347 were collected during the morning milking activity, when workers are exposed to the most  
348 bioaerosols, for a total of 15 samples.

### 349 Air Sampling

350 A liquid cyclonic impactor Coriolis  $\mu$ ® (Bertin Technologies, Montigny-le-Bretonneux, France)  
351 was used for collecting air samples. The sampler was set at 200 L/min for 10 minutes (2m<sup>3</sup> of air  
352 per sample) and placed within 1-2 meters of the source. The air flow in the sampler creates a  
353 vortex through which air particles enter the Coriolis cone and are impacted in the liquid. Fifteen  
354 millilitres of a phosphate buffer saline (PBS) solution with a concentration of 50 mM and a pH  
355 of 7.4 were used to fill the sampling cone.

### 356 Culture-Based Approach to Study Fungal Diversity

357 One millilitre of the 15ml Coriolis sampling liquid was used to perform a serial dilution from 10<sup>0</sup>  
358 to 10<sup>-4</sup> concentration/ml. The dilutions were made using 0.9% saline and 0.1% Tween20 solution  
359 and were performed in triplicate. Tween20 is a detergent that makes spores less hydrophobic and  
360 easier to collect. One hundred microlitres of each triplicate were plated on Rose Bengal Agar



361 with chloramphenicol at a concentration of 50 µg/ml. Half of the petri dishes were incubated at  
362 25°C for mesophilic mould growth and the other half at 50°C for thermophilic mould growth,  
363 specifically *Aspergillus fumigatus*. After 5 days of incubation, moulds were identified and counts  
364 were translated into CFU/m<sup>3</sup>.

#### 365 *Identification of Isolates*

366 Spores from cultured fungi were recovered in one millilitre of a 0.9 % saline and 0.1% Tween20  
367 solution and stored in an Eppendorf tube. Two hundred microlitres of the collection liquid were  
368 placed in an FTA card (sample collection card; Qiagen, Mississauga, Ontario, Canada). Five  
369 punches from the inoculated zone of the FTA card were placed in a microtube and washed three  
370 times with the FTA purification agent. The washing step is mandatory as it allows the removal of  
371 the chemical substrates in the FTA card that may alter the subsequent amplification step. Forty-  
372 eight microlitres of the master mix solution described in table 2 were placed in each microtube  
373 followed by amplification and sequencing of the ITS genomic region. The protocol described by  
374 White and his collaborators (46) was performed at the CHU (*Centre hospitalier de l'Université*  
375 *Laval*). The following oligonucleotides were used for the ITS region amplification:

376 ITS1: 5'-TCCGTAGGTGAACCTGCGG-3'

377 ITS4: 5'-TCCTCCGCTTATTGATATGC-3'

378 The identification of the isolates was made by comparing the sequences obtained with sequences  
379 in the UNITE database.

#### 380 *Fungal Spore Concentration by Filtration*

381 The following methods are described in detail by Mbareche and his coauthors 2018 (47). Briefly,  
382 the 45ml Coriolis suspension was filtered through a 2.5cm polycarbonate membrane (0.2-mm  
383 pore size; Millipore) using a vacuum filtration unit. The filters were placed in a 1.5ml Eppendorf

384 tube with 750µl of extraction buffer (bead solution) from a MoBio PowerLyser® Powersoil®  
385 Isolation DNA kit (Carlsbad, CA, U.S.A) and a 0.3cm tungsten bead. The filters were flash-  
386 frozen by placing the Eppendorf tube in a 99% ethanol solution and dry ice. The frozen filters  
387 were then pulverized using the tungsten steel bead in the Eppendorf tube in a bead-beating  
388 machine (a Mixer Mill MM301, Retsch, Düsseldorf, Germany) set at a frequency of 20  
389 movements per second for 20 minutes. The liquid containing the pulverized filter particles was  
390 used as aliquot for the first step of the DNA extraction procedure.

### 391 DNA Extraction

392 Using the same bead-beating machine, a second bead-beating step using glass beads at a  
393 frequency of 20 movements per second for 10 minutes was performed to ensure that all of the  
394 cells were ruptured. Next, a MoBio PowerLyser® Powersoil® Isolation DNA kit (Carlsbad, CA,  
395 U.S.A) was used to extract the total genomic DNA from the samples following the  
396 manufacturer's instructions. Next the DNA was eluted in a 100µl buffer and stored at -20°C until  
397 subsequent analyses.

### 398 Real-Time PCR Quantification

399 PCR was performed with a Bio-Rad CFX 96 thermocycler (Bio-Rad Laboratories, Mississauga,  
400 CANADA). The PCR mixture contained 2µl of DNA template, 0.150 µM per primer, 0.150 µM  
401 probe, and 7.5µl of 2× QuantiTect Probe PCR master mix (QuantiTect Probe PCR kit; Qiagen,  
402 Mississauga, Ontario, Canada) in a 15-µl reaction mixture. The results were analyzed using Bio-  
403 Rad CFX Manager software version 3.0.1224.1015 (Bio-Rad Laboratories). *Aspergillus*  
404 *fumigatus* was used as positive control and for the standard curves of both qPCR analyses  
405 (*Penicillium/Aspergillus* and *Aspergillus fumigatus*). Table 3 presents the primers, probes and  
406 PCR protocol used in this study.

## 407 Next-Generation Sequencing

408 The rRNA fungal gene ITS1 was used for the next-generation sequencing analyses.  
409 Amplification of the amplicons, equimolar pooling and sequencing were performed at the  
410 Plateforme d'analyses génomiques (IBIS, Université Laval, Quebec City, Canada). Briefly,  
411 amplification of the ITS1 regions was performed using the sequence specific regions described  
412 by Tedersoo et al. (2015) (48) and references therein, using a two-step dual-indexed PCR  
413 approach specifically designed for Illumina instruments. First, the gene-specific sequence was  
414 fused to the Illumina TruSeq sequencing primers and PCR was carried out on a total volume of  
415 25  $\mu$ L of liquid made up of 1X Q5 buffer (NEB), 0.25  $\mu$ M of each primer, 200  $\mu$ M of each of the  
416 dNTPs, 1 U of Q5 High-Fidelity DNA polymerase (NEB) and 1  $\mu$ L of template cDNA. The PCR  
417 started with an initial denaturation at 98°C for 30 s followed by 35 cycles of denaturation at 98°C  
418 for 10 s, annealing at 55°C for 10 s, extension at 72°C for 30s and a final extension step at 72°C  
419 for 2 min. The PCR reaction was purified using an Axygen PCR cleanup kit (Axygen). Quality  
420 of the purified PCR products was verified with electrophoresis (1% agarose gel). Fifty to 100-  
421 fold dilution of this purified product was used as a template for a second round of PCR with the  
422 goal of adding barcodes (dual-indexed) and missing sequence required for Illumina sequencing.  
423 Cycling conditions for the second PCR were identical to the first PCR but with 12 cycles. The  
424 PCR reactions were purified as above, checked for quality on a DNA7500 Bioanalyzer chip  
425 (Agilent) and then quantified spectrophotometrically with a Nanodrop 1000 (Thermo Fisher  
426 Scientific). Barcoded Amplicons were pooled in equimolar concentration (85 ng/ $\mu$ l) for  
427 sequencing on the illumina Miseq.  
428 The oligonucleotide sequences used for amplification are presented in Table 4.

429 Please note that primers used in this work contain Illumina specific sequences protected by  
430 intellectual property (Oligonucleotide sequences © 2007-2013 Illumina, Inc. All rights reserved.  
431 Derivative works created by Illumina customers are authorized for use with Illumina instruments  
432 and products only. All other uses are strictly prohibited.).

### 433 [Bioinformatics Workflow](#)

434 The bioinformatics workflow used in this study was developed during a compost study by  
435 Mbareche et al. (40). Briefly, after demultiplexing the raw FASTQ files, the reads generated  
436 from the paired end sequencing using Mothur v 1.35.1 were combined (49). Quality filtering was  
437 performed using Mothur by discarding reads with ambiguous sequences. Reads shorter than 100  
438 bp and longer than 450 bp were also discarded. Similar sequences were combined to reduce the  
439 computational burden, and the number of copies of the same sequence was displayed. This  
440 dereplication step was performed using USEARCH version 7.0.1090 (50). The selected region of  
441 fungal origin was then extracted from the sequences with ITSx which uses HMMER3 (51) to  
442 compare input sequences against a set of models built from a number of different ITS region  
443 sequences found in various organisms. Only the sequences belonging to *fungi* were kept for  
444 further analyses. Operational taxonomic units (OTUs) with a 97% similarity cut-off were  
445 clustered using UPARSE 7.1 (52). UCHIME was used to identify and remove chimeric  
446 sequences (53). QIIME version 1.9.1 (54) was used to assign taxonomy to OTUs based on the  
447 UNITE fungal ITS reference training data set for taxonomic assignment and to generate an OTU  
448 table. The fungal diversity analysis was achieved by using different QIIME scripts. The alpha  
449 and beta diversity scripts used are listed in the following link: <http://qiime.org/scripts/>.

### 450 [Statistical Analyses](#)

451 Concentrations of *PenAsp* were compared with the Kruskal-Wallis one-way analysis of variance.

452 The test was performed using the software R version 3.3.2 with RStudio Version 0.99.486. The  
453 same analysis was performed comparing concentrations of *Aspergillus fumigatus*.  
454 To determine the statistical significance of the variation observed with the multivariate analyses  
455 (PCoA), a PERMANOVA test was performed on the Bray-Curtis dissimilarity matrix. The  
456 *compare categories* QIIME script was used to generate the statistical results. Because  
457 PERMANOVA is a non-parametric test, significance is determined through permutations. The  
458 number of permutations used is 999. P-value  $\leq 0.05$  was considered statistically significant.  
459 Detailed information about the performance of the test are presented in the multivariate section  
460 of the results.

## 461 Conclusion

462 Bioaerosols from Eastern Canadian dairy farms contain high concentrations of highly diverse  
463 fungi. This study demonstrated that fungal bioaerosols have large diversity profiles. It also adds  
464 another piece to the puzzle regarding the complexity of bioaerosols relative to the sources  
465 present. This study also highlights the importance of using a high-throughput sequencing method  
466 combined with real-time PCR assay for quantification and an in-depth characterization of fungal  
467 diversity in bioaerosols to better assess occupational exposure. As air samples were collected  
468 during activities where workers are present, this study shows that human exposure to harmful  
469 fungi may be higher during milking activities (automatic or manual), as well as during handling  
470 of feed and silage and when spreading bedding. Based on the results of this investigation, the  
471 authors strongly recommend taking action to reduce workers' exposure to bioaerosols. Such  
472 measures include increased air-exchange rates, better confinement and source ventilation. If  
473 these measures cannot be applied, we recommend skin and respiratory protection for workers  
474 who are exposed on a daily basis as a means to reduce continuous exposure to harmful fungi

475 present in bioaerosols. The broad spectrum of fungi detected in this study includes many know  
476 pathogens and proves that adequate monitoring of bioaerosol exposure is necessary to evaluate  
477 and minimize risks.

## 478 ACKNOWLEDGEMENTS

479 HM is a recipient of the FRQNT PhD scholarship and received a short internship scholarship  
480 from the Quebec Respiratory Health Network. This work was supported by the Institut de  
481 Recherche Robert-Sauvé en Santé et en Sécurité du Travail (2014-0057). We are grateful to all  
482 of the employees of the dairy farms that participated in this study. We are also grateful to Julien  
483 Duchaine and Philippe Bercier that were in the field for their technical assistance. The authors  
484 are thankful to Amanda Kate Toperoff and Michi Waygood for English revision of the  
485 manuscript. CD is the head of the Bioaerosols and respiratory viruses strategic group of the  
486 Quebec Respiratory Health Network.

## 487 References:

- 488 1. Delmont TO, Robe P, Cecillon S, Clark IM, Constancias F, Simonet P, Hirsh PR and Vogel PM.  
489 2011. Accessing the soil metagenome for studies of microbial diversity. *Appl. Environ.*  
490 *Microbiol.* 77:1315–1324
- 491 2. Venter JC, Remington K, Heidleberg JF, Halpern AL, Rusch D, Eisen JA, Wu D, Paulsen I, Nelson  
492 KE, Fouts DE, Levy S, Knap AH, Lomas MW, Nealson K, White O, Peterson J, Hoffman J, Parsons  
493 R, Baden-Tillson H, Pfannkoch C, Rogers YH and Smith HO. 2004. Environmental genome shotgun  
494 sequencing of the Sargasso Sea. *Science*304:66–74
- 495 3. Be NA, Thissen J B, Fofanov VY, Allen JE, Rojas M, Golovko, G and Jaing, CJ. 2015. Metagenomic  
496 Analysis of the Airborne Environment in Urban Spaces. *Microbial Ecology*, 69, 346–355.  
497 <http://doi.org/10.1007/s00248-014-0517-z>

- 498 4. Brodie EL, DeSantis TZ, Parker JPM, Zubietta IX, Piceno YM, Andersen GL. Urban aerosols harbor  
499 diverse and dynamic bacterial populations. *Proceedings of the National Academy of Sciences of the*  
500 *United States of America*. 2007;104(1):299-304. doi:10.1073/pnas.0608255104.
- 501 5. Brown JKM and Hovmøller MS. 2002. Aerial dispersal of pathogens on the global and continental  
502 scales and its impact on plant disease. *Science* 297, 537–541.  
503 <http://dx.doi.org/10.1126/science.1072678>.
- 504 6. Douwes J. 2003. Bioaerosol health effects and exposure assessment: progress and prospects. *Ann.*  
505 *Occup. Hyg.* 47, 187–200. <http://dx.doi.org/10.1093/annhyg/meg032>.
- 506 7. Heederik D and Von Mutius E. 2012. Does diversity of environmental microbial exposure matter for  
507 the occurrence of allergy and asthma? *J. Allergy Clin. Immunol.* 130, 44–50.  
508 <http://dx.doi.org/10.1016/j.jaci.2012.01.067>.
- 509 8. Gilbert Y and Duchaine, C. 2009. Bioaerosols in industrial environments: a review. *Can. J. Civ. Eng.*  
510 36: 1873–1886. doi:10.1139/L09-117.
- 511 9. Tsapko VG, Chudnovets AJ, Sterenbogen MJ, Papach VV, Dutckiewicz J, Skorska C, Krysinka-  
512 Traczyk E and Golec M. 2011. Exposure to bioaerosols in the selected agricultural facilities of the  
513 Ukraine and Poland - A review. *Ann Agric Environ Med* 2011, 18, 19–27.
- 514 10. Lanier C, Richard E, Heutte N, Picquet R, Bouchart V and Caron D. 2010. Airborne moulds and  
515 mycotoxins associated with handling of corn silage and oilseed cakes in agricultural environment.  
516 *Atmospheric Environment*. Volume 44 Issue 16. Pages 1980-1986.
- 517 11. Milner PD. 2009. Bioaerosols associated with animal production. *Bioresource Technology*. Volume  
518 100. Issue 22. November 2009. Pages 5379-5385.
- 519 12. Nehme B, Létourneau V, Foster RJ, Veillette M and Duchaine C. 2008. Culture-Independent  
520 approach of the bacterial bioaerosol diversity in the standard swine confinement buildings, and  
521 assessment of the seasonal effect. *Environmental microbiology*. Volume 10. Issue 3. March 2008.  
522 Pages 665-675.

- 523 13. Létourneau V, Nehmé B, Mériaux A, Daniel M, Cormier Y and Duchaine C. 2010. Human pathogens  
524 and tetracycline-resistant bacteria in bioaerosols of swine confinement buildings and in nasal flora of  
525 hog producers. *International Journal of Hygiene and Environmental Health*. Volume 213, Issue 6,  
526 November 2010, Pages 444-449.
- 527 14. Fung F and Hughson WG. 2003. Health effects of indoor fungal bioaerosol exposure. *Appl Occup*  
528 *Environ Hyg* 2003;08(7):535-44.
- 529 15. Eduard W. 2008. A health based criteria document on fungal spore exposure in the working  
530 population. Is it relevant for the general population? *Indoor Air* 2008;18(3):257-8.
- 531 16. Duchaine C, Mériaux A, Brochu G and Cormier Y. 1999. Airborne microflora in Quebec dairy farms:  
532 Lack of effect of bacterial hay preservatives. *American Industrial Hygiene Association Journal*. 60:1,  
533 89-95.
- 534 17. Festenstein G, Lacey J and Skinner FA. 1968. Self-heating of hay and grain in Dewar flask and the  
535 development of farmer's lung antigens. *J. Gen. Microbiol*. 41:389–407 (1965).
- 536 18. Gregory PH, Lacey ME, Festenstein GN and Skinner FA. 1963. Microbial and biochemical changes  
537 during the molding of hay. *J. Gen. Microbiol*. 33:147–174 (1963)
- 538 19. Kotimaa MH, Oksanen L and Koskela P. 1991. Feeding and bedding materials as sources of  
539 microbial exposure on dairy farms. *Scandinavian Journal of Work, Environment & Health* Vol. 17,  
540 No. 2 (April 1991), pp. 117-122
- 541 20. Porter P, Susaria SC, Polikepahad S, Qian Y, Hampton J, Kiss A, Vaidya S, Sur S, Onger V, Yang T,  
542 Delclos GL, Abramson S, Kheradmand F and Corry DB. 2009. Link between allergic asthma and  
543 airway mucosal infection suggested by proteinase-secreting household fungi. *Mucosal*  
544 *Immunology*, 2(6), 504–517.
- 545 21. Hardin BD, Kelman BJ and Saxon A. 2003. Adverse human health effects associated with moulds in  
546 the indoor environment. *J Occup Environ Med*. 2003;45:470–478.
- 547 22. Bush RK, Portnoy JM, Saxon A, Terr AL and Wood RA. 2006. The medical effects of mould  
548 exposure. *J Allergy Clin Immunol*. 2006;117:326–333



- 549 23. Arshad SH, Tariq SM, Matthews S and Hakim E. 2001. Sensitization to common allergens and its  
550 association with allergic disorders at age 4 years: a whole population birth cohort  
551 study. *Pediatrics*. 2001;108:E33–E37.
- 552 24. Stark PC, Celedón JC, Chew GL, Ryan LM, Burge HA, Muilenberg ML and Gold DR. 2005. Fungal  
553 Levels in the Home and Allergic Rhinitis by 5 Years of Age. *Environmental Health*  
554 *Perspectives*, 113(10), 1405–1409. <http://doi.org/10.1289/ehp.7844>
- 555 25. Glass D. & Amedee RG. 2011. Allergic Fungal Rhinosinusitis: A Review. *The Ochsner*  
556 *Journal*, 11(3), 271–275.
- 557 26. Chowdhary A, Agarwal K, Kathuria S, Gaur SN, Randhawa HS and Meis JF. 2014. Allergic  
558 bronchopulmonary mycosis due to fungi other than *Aspergillus*: a global overview. *Crit Rev*  
559 *Microbiol*. Feb;40(1):30-48.
- 560 27. Sarkar A, Mukherjee A, Ghoshal AG, Kundu S, Mitra S. 2010. Occurrence of allergic  
561 bronchopulmonary mycosis in patients with asthma: An Eastern India experience. *Lung India* :  
562 Official Organ of Indian Chest Society. 2010;27(4):212-216. doi:10.4103/0970-2113.71949.
- 563 28. Pieckova E. and Wilkins K. 2004. Airway toxicity of house dust and its fungal composition. *Annals*  
564 *of Agricultural and Environmental Medicine*. 11:67–73.
- 565 29. Selman M, Padro A and King TE jr. 2012. Hypersensitivity pneumonitis: insights in diagnosis and  
566 pathobiology. *Proc Am Thorac Soc Vol 7*. pp 229–236
- 567 30. Wyngaarden, J. B., L. H. Smith, and J. C. Bennett (ed.). 1992. *Cecil textbook of medicine*, 19th ed.,  
568 p. 399 and 407. W.B. Saunders Co., Philadelphia, Pa.
- 569 31. Cormier Y, Bélanger J, Durand P. 1985. Factors influencing the development of serum precipitins to  
570 farmer's lung antigen in Quebec dairy farmers. *Thorax*. 1985;40(2):138-142.
- 571 32. Madsen D, Klock LE, Wenzel FJ, Robbins JL and Schmidt CD. 1976. The prevalence of farmer's  
572 lung in an agricultural population. *Am. Rev. Respir. Dis*. 113:171–174 (1976).
- 573 33. Rylander R. 1996. Airway Responsiveness and Chest Symptoms after Inhalation of Endotoxin or  
574 (1→3)-β-D-Glucan. *Indoor and Built Environment*, 5, 106-111.

- 575 34. Zekovic DB, Kwiatkowski S, Vrvic MM, Jakovljevic D and Moran CA. 2005. Natural and Modified  
576 (1→3)-β-D-Glucans in Health Promotion and Disease Alleviation. Critical Reviews in  
577 Biotechnology, 15, 205-230.
- 578 35. Fogelmark B, Sjöstrand M and Rylander R. 1994. Pulmonary inflammation induced by repeated  
579 inhalations of (1,3)-D-glucan and endotoxin. Int.J.Exp.Path. , 75, 85-90.
- 580 36. Daisey JM, Angell WJ and Apte MG. 2003. Indoor air quality, ventilation and health symptoms in  
581 schools: an analysis of existing information. Indoor Air 2003; 13: 53-64.
- 582 37. Haleem Khan AA and Karuppayil MS. Fungal pollution of indoor environments and its management.  
583 Saudi Journal of Biological Sciences. Volume 19, Issue 4, pp 405-426
- 584 38. Burge HA and Rogers CA. 2000. Outdoor allergens. Environmental Health Perspectives 108, 653–  
585 659.
- 586 39. Bush RK. 2008. Indoor allergens, environmental avoidance, and allergic respiratory disease. Allergy  
587 and Asthma Proceedings 29 (6), 575–579.
- 588 40. Mbareche H, Veillette M, Bonifait L, Dubuis ME, Bernard Y, Marchand G, Bilodeau GJ and  
589 Duchaine C. 2017. A next generation sequencing approach with a suitable bioinformatics workflow to  
590 study fungal diversity in bioaerosols released from two different types of compost plants. Sci Total  
591 Environ. 2017 Dec 1;601-602:1306-1314
- 592 41. Mbareche H et al. 2018a. Workers exposure to fungal bioaerosols in biomethanization facilities. In  
593 press
- 594 42. Lanier C, André C, Séguin V, Heutte N, El kaddoumi A, Bouchart V, Picquet R and Garon D. 2012.  
595 Recurrence of *Stachybotrys chartrum* during mycological and toxicological study of bioaerosols  
596 collected in dairy cattle shed. *Ann Agric Environ Med* 2012;19(1):61-7.
- 597 43. Poperscu S, Borda C and Diugan E. 2011. Microbiological air quality in tie-stall dairy barns and some  
598 factors that influence it. *Afr J Agric Res* 201; 6(32):6726-34.

- 599 44. Lee JA, Thorne PS, Reynolds SJ, O'Shaughnessy PT. 2007. Monitoring risks in association with  
600 exposure levels among wastewater treatment plant workers. *Occup Environ Hyg* 2007;49(11):1235-  
601 48.
- 602 45. Adhikari A, Reponen T, Lee SA and Grinshpun SA. 2004. Assessment of human exposure to  
603 airborne fungi in agricultural confinements: personal inhalable sampling versus stationary sampling.  
604 *Ann Agric Environ Med* 2004;11(2):269-77.
- 605 46. White, T. J., Bruns, T., Lee, S. and Taylor, J. 1990. Amplification and direct sequencing of fungal  
606 ribosomal RNA genes for phylogenetics. *PCR protocols: A guide to Methods and Applications*.
- 607 47. Mbareche H, Veillette M, Bilodeau GJ, Wösten H and Duchaine C. 2018b. Fungal spore recovery  
608 from air samples: a tale of loss and gain. In press
- 609 48. Tedersoo L, Anslan S, Bahram M, Polme S, Riit T, Liiv I, Koljalg U, Kisand V, Nilsson H,  
610 Hildebrand F, Bork P and Abarenkov K. 2015. Shotgun metagenomes and multiple primer  
611 pairbarcode combinations of amplicons reveal biases in metabarcoding analyses of fungi. *MycKeys*  
612 10: 1-43.
- 613 49. Schloss PD, Westcott SL, Ryabin T, Hall JR, Hartmann M, Hollister EB, Lesniewski RA, Oakley  
614 BB, Parks DH, Robinson CJ, Sahl JW, Stres B, Thallinger GG, Van Horn DJ and Weber CF. 2009.  
615 Introducing mother: open-source, platform-independent, communiti-supported software for  
616 describing and comparing microbial communities. *Appl Environ Microbiol.* 75(23):7537-41
- 617 50. Edgar RC. 2010. Search and clustering orders of magnitude faster than  
618 BLAST, *Bioinformatics* 26(19), 2460-2461
- 619 51. Mistry J, Finn RD, Eddy SR, Bateman A and Punta M. 2013. Challenges in Homology Search:  
620 HMMER3 and Convergent Evolution of Coiled-Coil Regions. *Nucleic Acids Research*, 41: e121,  
621 2013
- 622 52. Edgar RC. 2013. UPARSE: Highly accurate OTU sequences from microbial amplicon reads, *Nature*  
623 *Methods*

- 624 53. Edgar RC, Haas Bj, Clemente JC, Quince C and Knight R. 2011. UCHIME improves sensitivity and  
625 speed of chimera detection. *Bioinformatics*. 27(16):2194-200. doi: 10.1093/bioinformatics/btr381
- 626 54. Caporaso JG, Kuczynski J, Stombaugh J, Bittinger K, Bushman FD, Costello EK, Fiere N, Gonzalez  
627 Pena A, Goodrich JK, Gordon GI, Huttley GA, Kelley ST, Knights D, Koenig JE, Ley RE, Lozupone  
628 CA, McDonald D, Muegge BD, Pirrung M, Reeder J, Sevinsky JR, Turnbaugh PJ, Walters WA,  
629 Widmann J, Yatsunencko T, Zaneveld J and Knight R. 2010. QIIME allows analysis of high-  
630 throughput community sequencing data. *Nature Methods* 7(5): 335-336
- 631 55. Ramette A. 2007. Multivariate analyses in microbial ecology. *FEMS Microbiol Ecol*. **62**(2):142–160
- 632 56. Anderson M.J. 2005. PERMANOVA: a FORTRAN computer program for permutational multivariate  
633 analysis of variance. Department of Statistics, University of Auckland, New Zealand 24
- 634 57. Nehme B, Gilbert Y, Létourneau V, Forster RJ, Veillette M, Villemur R and Duchaine C. 2009.  
635 Culture-independent characterization of archaeal biodiversity in swine confinement building  
636 bioaerosols. *Appl. Environ. Microbiol*. 75:5445–5450
- 637 58. Just N, Kirychuk S, Gilbert Y, Létourneau V, Veillette M, Singh B and Duchaine C. 2011. Bacterial  
638 diversity characterization of bioaerosols from cage-housed and floor-housed poultry operations.  
639 *Environmental Research*. Volume 111, Issue 4, May 2011, Pages 492-498
- 640 59. Blais Lecours P, Veillette M, Marsolais D and Duchaine C. 2012. Characterization of Bioaerosols  
641 from Dairy Barns: Reconstructing the Puzzle of Occupational Respiratory Diseases by Using  
642 Molecular Approaches. *Applied and Environmental Microbiology*. 2012;78(9):3242-3248.
- 643 60. Blais Lecours P, Duchaine C, Taillefer M, Tremblay C, Veillette M, Cormier Y and Marsolais D.  
644 2011. Immunogenic Properties of Archaeal Species Found in Bioaerosols. *PLoS ONE*, 6(8), e23326.  
645 <http://doi.org/10.1371/journal.pone.0023326>.
- 646 61. Haugland RA, Varma M, Wymer LJ and Vesper SJ. 2004. Quantitative PCR analyses of selected  
647 *Aspergillus*, *Penicillium* and *Paecilomyces* species. *Systematic and Applied Microbiology*. Volume  
648 27, Issue 2, 2004, Pages 198-210

- 649 62. Greenberger PA. 2002. Allergic bronchopulmonary aspergillosis. *Journal of Allergy and Clinical*  
650 *Immunology*. Volume 110, Issue 5, November 2002, Pages 685-692
- 651 63. Dogra V, Sinha AK, Saxena R and Talwar D. 2016. *Aspergillus* march: from ABPA to aspergilloma  
652 to subacute invasive aspergillosis. *Allergy, Asthma & Clinical Immunology* 2016;12:64
- 653 64. Adams RS. 2017. Mold and mycotoxin problems in livestock feeding. PennState Extension.  
654 Department of Veterinary Science. [https://extension.psu.edu/mold-and-mycotoxin-problems-in-](https://extension.psu.edu/mold-and-mycotoxin-problems-in-livestock-feeding)  
655 [livestock-feeding](https://extension.psu.edu/mold-and-mycotoxin-problems-in-livestock-feeding) Visited: 15 November 2017.
- 656 65. Seglar B. 2013. Diversity of silage moulds produces harmful mycotoxins.  
657 [https://www.progressiveforage.com/forage-types/silage/diversity-of-silage-molds-produces-harmful-](https://www.progressiveforage.com/forage-types/silage/diversity-of-silage-molds-produces-harmful-mycotoxins)  
658 [mycotoxins](https://www.progressiveforage.com/forage-types/silage/diversity-of-silage-molds-produces-harmful-mycotoxins) Visited: 15 November 2017
- 659 66. Basinas I, Sigsgaard T, Erlandsen M, Andersen NT, Takai H, Heederik D, Omland O, Kromhout H  
660 and Schlünssen. 2014. Exposure-affecting factors of dairy farmers' exposure to inhalable dust and  
661 endotoxin. *Ann Occup Hyg*, 2014 Jul;58(6):707-23
- 662 67. Garcia J, Benett DH, Tancredi D, Schenker MD, Mitchell D, Reynolds SJ and Mitloehner FM. 2013.  
663 Occupational exposure to particulate matter and endotoxin for California Dairy workers. *Int J Hyg*  
664 *Environ Health* 2013;216:56-63
- 665 68. Samadi S, Van Eerdenburg FJ, Jamshidifard AR, Otten GP, Droppert M, Heederick DJ and Wouters  
666 IM. 2012. The influence of bedding materials in bio-aerosol exposure in dairy barns. *J Expo Sci*  
667 *Environ Epidemiol* 2012;22(4):361-8
- 668 69. Popescu S, Borda C and Diugan E. Microbiological air quality in tie-stall dairy barns and some  
669 factors that influence it. *Afr J Agric Res* 2011;6(32):6726-34
- 670 70. Buttigieg, P.L. and Ramette, A. 2014. A Guide to Statistical Analysis in Microbial Ecology: a  
671 community-focused, living review of multivariate data analyses. *FEMS Microbiol Ecol*.90: 543–550
- 672 71. Hibbett DS and Matheny PB. 2009. The relative ages of ectomycorrhizal mushrooms and their plant  
673 hosts estimated using Bayesian relaxed molecular clock analyses. *BMC Biology*, 7, 13.

- 674 72. Morgenstern I, Klopman S and Hibbett DS. 2008. Molecular evolution and diversity of lignin  
675 degrading heme peroxidases in the Agaricomycetes. *J Mol Evol.* 2008 66: 243.
- 676 73. Geiser DM, Gueidan C, Miadlikowska J, Lutzoni F, Kauff F, Hofstetter V, Fraker E, Schoch CL,  
677 Tibell L, Untereiner WA and Aptroot A. 2006. Eurotiomycetes: Eurotiomycetidae and  
678 Chaetothriomycetidae. *Mycologia*\_Vol. 98, Iss. 6
- 679 74. Pitt JI and Hocking AD. 2009. The Ecology of Fungal Food Spoilage. In: *Fungi and Food*  
680 *Spoilage.* Springer, Boston, MA
- 681 75. Woolford MK and Pahlow G. 1998. The silage fermentation. *Microbiology of Fermented Foods*, pp.  
682 73–102, Springer US
- 683 76. Schoch CL, Spatafora JW, Lumbsch T, Hundorf SM, Kevin DH, Johannes ZG and Crous WD.  
684 2009. A phylogenetic re-evaluation of Dothideomycetes *Studies in Mycology.* 64. CBS-KNAW  
685 Fungal Biodiversity Centre. ISBN 978-90-70351-78-6
- 686 77. Hibbett DS, Binder M, Bischoff JF, Blackwell M, Cannon PF, Eriksson OE, Huhndorf S, James  
687 T, Kirk PM, Lücking R, Thorsten Lumbsch H, Lutzoni F, Matheny PB, McLaughlin DJ, Powell  
688 MJ, Redhead S, Schoch CL, Spatafora JW, Stalpers JA, Vilgalys R, Aime MC, Aptroot A, Bauer  
689 R, Begerow D, Benny GL, Castlebury LA, Crous PW, Dai YC, Gams W, Geiser DM, Griffith  
690 GW, Gueidan C, Hawksworth DL, Hestmark G, Hosaka K, Humber RA, Hyde KD, Ironside  
691 JE, Kõljalg U, Kurtzman CP, Larsson KH, Lichtwardt R, Longcore J, Miadlikowska J, Miller  
692 A, Moncalvo JM, Mozley-Standridge S, Oberwinkler F, Parmasto E, Reeb V, Rogers JD, Roux  
693 C, Ryvarden L, Sampaio JP, Schüssler A, Sugiyama J, Thorn RG, Tibell L, Untereiner WA, Walker  
694 C, Wang Z, Weir A, Weiss M, White MM, Winka K, Yao YJ, Zhang N . 2007. A higher level  
695 phylogenetic classification of the *Fungi*. *Mycological Research.* 111 (5): 509–547.
- 696 78. Zalar P, de Hoog SG, Schroers HJ, Frank JM and Gunde-Cimerman N. 2005. Taxonomy and  
697 phylogeny of the xerophilic genus *Wallemia* (Wallemiomycetes and Wallemiales, cl. et ord.  
698 nov.). *Antonie Van Leeuwenhoek International Journal of General and Molecular*  
699 *Microbiology.* 87 (4): 311–28

- 700 79. Pitt JI and Hocking AD. 1977. Influence of solute and hydrogen ion concentration on the water  
701 relations of some xerophilic fungi. J. Gen. Microbiol. 101:35-40
- 702 80. Hanhela R, Louhelainen K and Pasanen AL. 1995. Prevalence of microfungi in Finnish cow barns  
703 and some aspects of the occurrence of *Wallemia sebi* and *Fusaria*.
- 704 81. Sakamoto T, Urisu A, Yamada M, Matsuda Y, Tanaka K and Torii S. 1989. Studies on the  
705 osmophilic fungus *Wallemia sebi* as an allergen evaluated by skin prick test and radioallergosorbent  
706 test. Int. Arch. Allergy Appl. Immunol. 90:368-372
- 707 82. Reboux G, Piarroux R, Mauny F, Madroszyk A, Millon L, Bardonnnet K, Dalphin JC. 2001. Role of  
708 moulds in farmer's lung disease in eastern France. Am. J. Respir. Crit. Care Med. 163:1534-153
- 709 83. Shade , Hogan CS, Klimowicz AK, Linske M, McManus PS, Handelsman J. 2012. Culturing captures  
710 members of the rare biosphere. Environmental Microbiology. 14(9), 2247–2252
- 711 84. Velegraki A, Cafarchia C, Gaitanis G, Iatta R and Boekhout T. 2015. Malassezia Infections in  
712 Humans and Animals: Pathophysiology, Detection, and Treatment. PLoS Pathog 11(1): e1004523.
- 713 85. Matsuzawa T, Tanaka R, Horie Y, Gono T and Yaguchi T. 2010. Development of rapid and specific  
714 molecular discrimination methods for pathogenic *Emericella* species. Jpn. J. Med. Mycol. Vol. 51,  
715 109-116, 2010, ISSN 0916-4804
- 716 86. Rodriguez ZC, and Ramos MG. 2014. Acremonium species associated fungemia: a novel pathogen in  
717 the immunosuppressed patient. Bol Asoc Med P R. 2014;106(3):29-31
- 718 87. Nucci M and Anaissie E. 2007. *Fusarium* Infections in Immunocomprised Patients. Clin. Microbiol.  
719 Rev. vol. 20 no. 4 695-704
- 720 88. Peat JK, Tovey E, Mellis CM, Leeder SR and Woolcock AJ. 1993. Important of house dust mite and  
721 *Alternaria* allergens in childhood asthma: an epidemiological study in two climatic regions of  
722 Australia. Clinical & Experimental Allergy. Volume 23, Issue 10, Pages 812-820
- 723

724 **Table 1:** Description of the sampling sites and the parameters affecting the sampling  
725 environments

|            | <i>Type of milking</i> | <i>Animal space</i> | <i>Cattle feed</i>       | <i>Ventilation</i> | <i>Temperature</i> | <i>Time of sampling</i> |
|------------|------------------------|---------------------|--------------------------|--------------------|--------------------|-------------------------|
| <b>DF1</b> | manual                 | confined            | forage                   | natural            | 22°C               | 6 am – 9 am             |
| <b>DF2</b> | automatic              | confined            | forage                   | mechanical         | 21°C               | 7 am – 10 am            |
| <b>DF3</b> | manual                 | confined            | concentrates             | natural            | 19°C               | 7 am – 10 am            |
| <b>DF4</b> | automatic              | confined            | concentrates<br>& forage | mechanical         | 20°C               | 6 am – 9 am             |
| <b>DF5</b> | manual                 | semi-<br>confined   | forage                   | mechanical         | 23°C               | 11 am – 2 pm            |

726

727

728 **Table 2:** Master mix of the ITS amplification reaction

| Substance                                           | Concentration                  | Volume                               |
|-----------------------------------------------------|--------------------------------|--------------------------------------|
| PCR-mix<br>(IDT, Coralville, États-Unis)            | 5x                             | 10µl                                 |
| MgCl <sub>2</sub><br>(IDT, Coralville, États-Unis)  | 25 nM                          | 6µl                                  |
| Taq DNA polymerase<br>(IDT, Coralville, États-Unis) | 5 µ/µl                         | 0.5µl                                |
| Primer ITS1<br>(Promega, Madison, États-Unis)       | 100 µM/769 µl IDTE Buffer pH8  | 0.125µl                              |
| Primer ITS4<br>(Promega, Madison, États-Unis)       | 100 µM/1399 µl IDTE Buffer pH8 | 0.125µl                              |
| dNTP<br>(IDT, Coralville, États-Unis)               | 10 nM                          | 0.5µl                                |
| ADN                                                 | -                              | 2µl of ADN (5 punch of the FTA-card) |
| H <sub>2</sub> O                                    | -                              | 30.75µl                              |

729



730 **Table 3:** Primers, probes and protocol used for qPCR quantification of selected microorganisms

| Microorganisms and references                                                                                                                                                 | Primers and probes                                                                                                                                       | PCR protocol                                                                                       |
|-------------------------------------------------------------------------------------------------------------------------------------------------------------------------------|----------------------------------------------------------------------------------------------------------------------------------------------------------|----------------------------------------------------------------------------------------------------|
| <i>Penicillium</i> , <i>Aspergillus</i> and <i>Paecilomyces variotii</i><br><a href="http://www.epa.gov/microbes/moldtech.html">http://www.epa.gov/microbes/moldtech.html</a> | <b>PenAsp1mgb (Taqman)</b><br>PenAspR1: 5'-GCCCGCCGAAGCAAC-3'<br>PenAspF1: 5'-CGGAAGGATCATTACTGAGTG-3'<br>PenAspP1mgb: 5'-FAM-CCAACCTCCCACCCGTG-TAMRA-3' | Activation: 94°C-3min<br>Denaturation: 94°C-15sec<br>Annealing/extension: 60°C-60sec<br>Cycles: 40 |
| <i>Aspergillus fumigatus</i> and <i>Neosartoya fischeri</i><br><a href="http://www.epa.gov/microbes/moldtech.html">http://www.epa.gov/microbes/moldtech.html</a>              | <b>Afumi (Taqman)</b><br>AfumiR1: 5'-CCGTTGTTGAAAGTTTTAACTGATTAC-3'<br>AfumiF1: 5'-GCCCGCCGTTTCGAC-3'<br>AfumiP1: 5'-CCCGCCGAAGACCCCAACATG-3'            | Activation: 94°C-3min<br>Denaturation: 94°C-15sec<br>Annealing/extension: 60°C-60sec<br>Cycles: 40 |

731

732 **Table 4:** Primers used for Illumina amplification

|                   |                                                                                                                                                                               |
|-------------------|-------------------------------------------------------------------------------------------------------------------------------------------------------------------------------|
| First-PCR primer  | <b>ITS1Fngs:</b> 5'-ACACTCTTCCCTACACGACGCTCTTCCGATCTGGTCATTTAGAGGAAGTAA-3'<br><b>ITS2:</b> 5'-GTGACTGGAGTTCAGACGTGTGCTCTTCCGATCTGCTGCGTTCTTCATCGATGC-3'                       |
| Second-PCR primer | <b>Generic forward:</b> 5'-AATGATACGGCGACCACCGAGATCTACAC[index1]ACACTCTTCCCTACACGAC-3'<br><b>Generic reverse:</b> 5'-CAAGCAGAAGACGGCATACGAGAT[index2]GTGACTGGAGTTCAGACGTGT-3' |

733

734

735 **Table 5:** Comparison of p-value of the concentrations obtained by qPCR between groups of  
736 samples within four environmental factors using Kruskal-Wallis one-way analysis of variance.

| Environmental factors                                                   | <i>PenAsp</i> (p-value) | <i>Aspergillus fumigatus</i> (p-value) |
|-------------------------------------------------------------------------|-------------------------|----------------------------------------|
| <i>Animal Space</i><br>(confined vs semi-confined)                      | 0.09                    | 0.06                                   |
| <i>Cattle feed</i><br>(forage vs concentrates vs concentrates & forage) | 1                       | 0.07                                   |
| <i>Type of milking</i><br>(automatic vs manual)                         | 0.74                    | 0.07                                   |
| <i>Type of Ventilation</i><br>(mechanical vs natural)                   | 0.8                     | 0.08                                   |

737

738

739 **Table 6:** Summary of the parameters and results of the principal coordinates analysis of air  
740 samples collected from five dairy farms including the statistical significance of the sample  
741 clustering. The PCoA was calculated using the Bray-Curtis dissimilarity based on ITS1

742 **sequences.** The three principal coordinate axes captured over 90% of the variation in the input  
 743 DF samples. The statistical significance of the variation observed with the PCoA analyses was  
 744 determined using a PERMANOVA statistical test. Four environmental variables were used for  
 745 sample clustering, only two were statistically significant (*Animal space* and *Cattle feed*).

| Environmental factors                                                   | Sample clustering | Permanova (p-value) |
|-------------------------------------------------------------------------|-------------------|---------------------|
| <i>Animal Space</i><br>(confined vs semi-confined)                      | √                 | 0.04                |
| <i>Cattle feed</i><br>(forage vs concentrates vs concentrates & forage) | √                 | 0.05                |
| <i>Type of milking</i><br>(automatic vs manual)                         | X                 | 0.61                |
| <i>Type of Ventilation</i><br>(mechanical vs natural)                   | X                 | 0.90                |

746

747

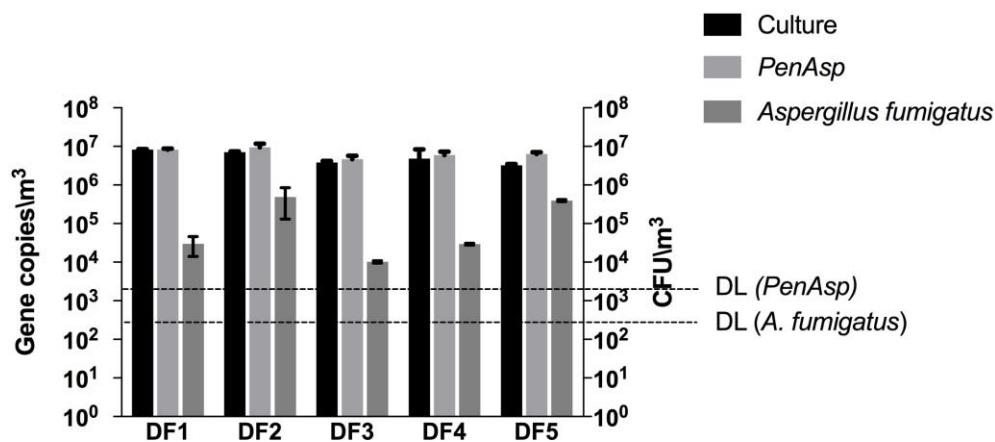

748

749 **Figure 1: Concentrations of viable spores of mesophilic fungi (from culture),**  
 750 *Penicillium/Aspergillus* (*PenAsp* from qPCR) and *Aspergillus fumigatus* (from qPCR) in air  
 751 samples collected from five different dairy farms. The detection limit of the qPCR run was 2 x  
 752 10<sup>3</sup> Gene copies/m<sup>3</sup> for *PenAsp* and 5 x 10<sup>2</sup> Gene copies/m<sup>3</sup> for *Aspergillus fumigatus*.

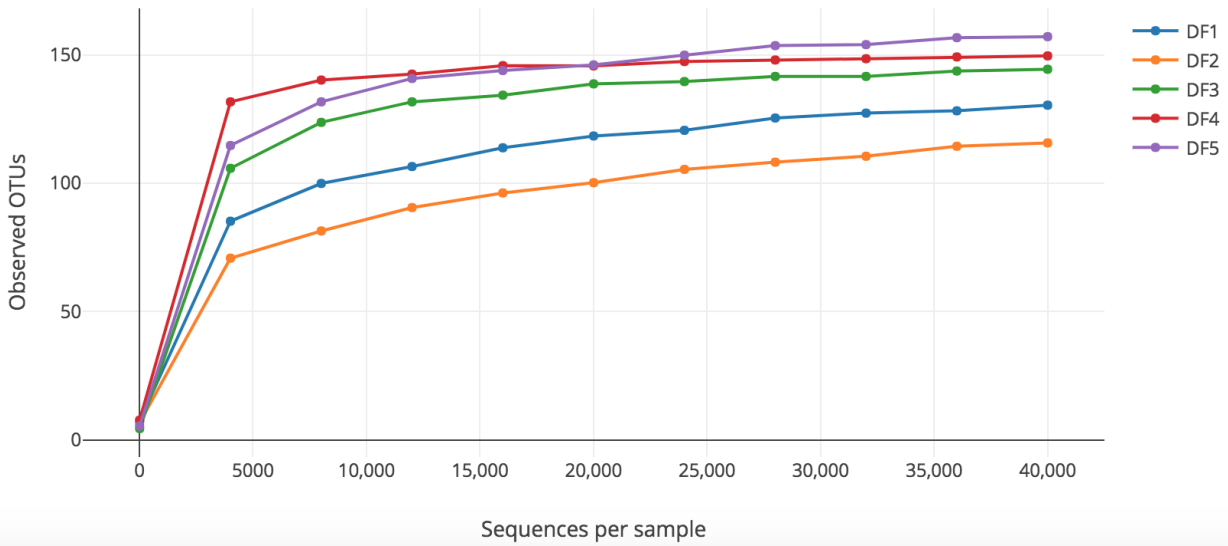

753

754 **Figure 2: Rarefaction curves obtained from the number of observed OTUs and the**  
 755 **sequences per sample for air samples from the five dairy farms visited. The plateau of the**  
 756 **curves started at around 5000 sequences.**

757

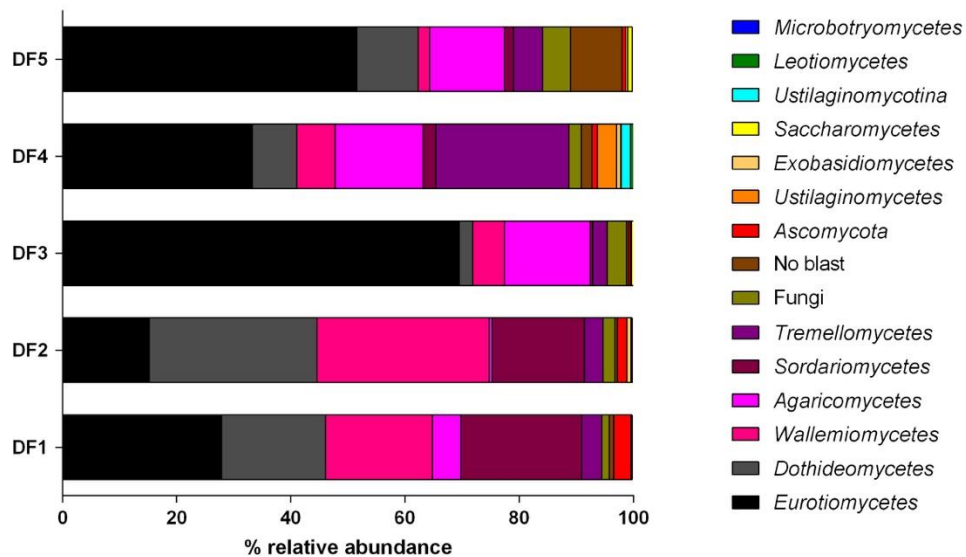

758

759 **Figure 3: Relative abundance of fungi classes detected in air samples from five dairy farms**  
760 **using next-generation sequencing.** While 12 classes were detected, six dominate the diversity  
761 profiles. Those six classes have different distributions among the five dairy farms visited.  
762

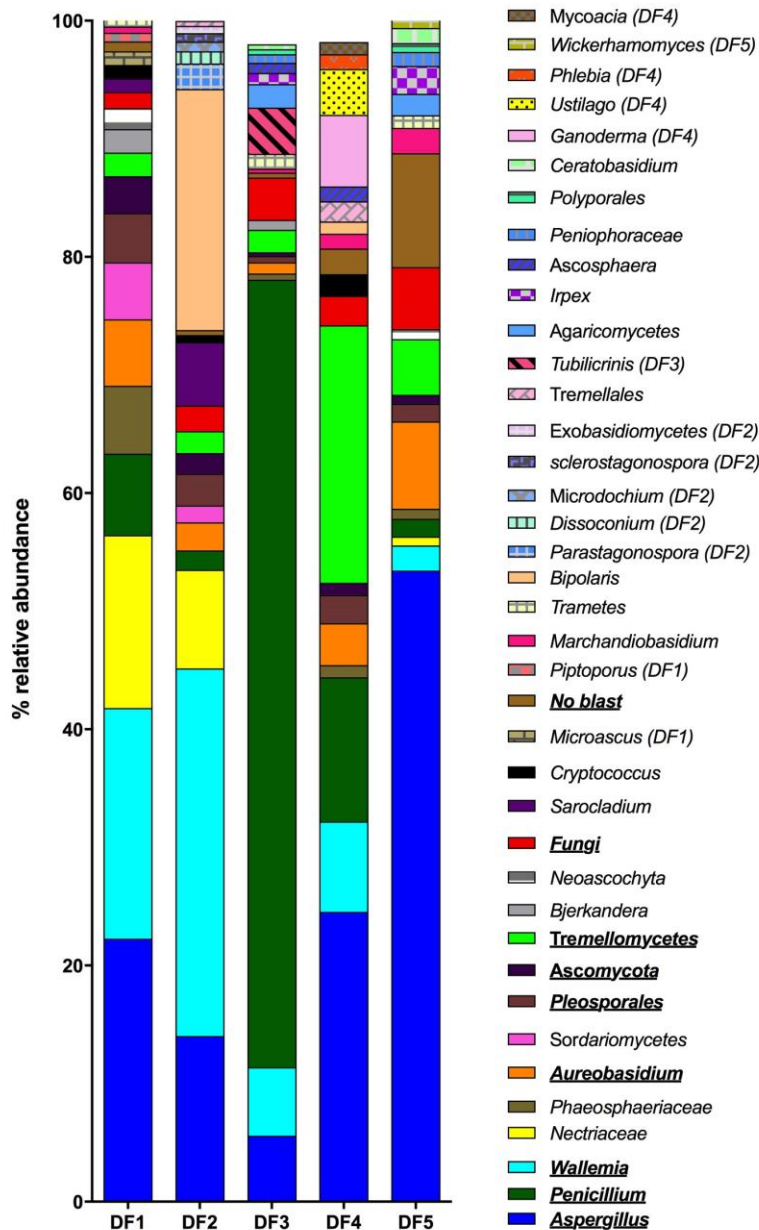

763  
764 **Figure 4: Relative abundance of fungal genera detected in air samples from five dairy**  
765 **farms.** The 20 most abundant genera from each dairy farm were included in the analyses. The

766 underlined bold fungi were common in all the dairy farms. The fungi that were detected only in  
 767 one dairy farm have the DF identification after their name.  
 768

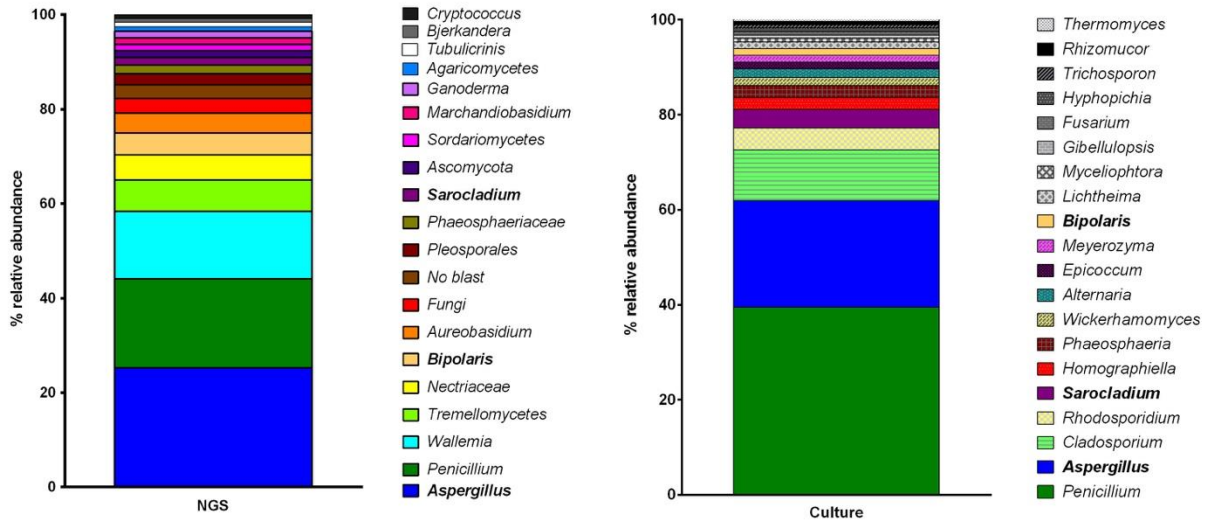

769  
 770 **Figure 5: Relative abundance of fungal genera identified by next generation sequencing**  
 771 **(NGS) and culture in air samples collected from five dairy farms. Fungi in bold character are**  
 772 **common to both approaches.**  
 773
